# Supplementary material for: Mapping a double flower phenotype-associated gene DcAP2L in Dianthus chinensis
Source: PubMed Central journal article supplement (PMC7242084; doi:10.1093/jxb/erz558), 2020-01-28
Supplement: erz558_suppl_supplementary_tables_figures.pdf [file erz558_suppl_supplementary_tables_figures.pdf]

**Mapping a double flower phenotype associated gene *DcAP2L* in *Dianthus chinensis* by using Reduced-Representation Genome Sequencing and BSR-seq analysis**

**Qijian Wang<sup>1,2</sup>, Xiaoni Zhang<sup>1,2</sup>, Shengnan Lin<sup>1,2</sup>, Shaozong Yang<sup>1,2</sup>, Xiuli Yan<sup>1,2</sup>, Mohammed Bendahmane<sup>1,3</sup>, Manzhu Bao<sup>1,2</sup>, and Xiaopeng Fu<sup>1,2,\*</sup>**

<sup>1</sup>Key Laboratory of Horticultural Plant Biology, College of Horticulture and Forestry Sciences, Huazhong Agricultural University, Wuhan 430070, China;

qjwang@webmail.hzau.edu.cn (Q.W.); zhangxiaoni@webmail.hzau.edu.cn (X.Z.);

yangshaozong@webmail.hzau.edu.cn (S.Y.); mzbao@mail.hzau.edu.cn (M.B.);

Yanxiuli@webmail.hzau.edu.cn (X.Y.); linshengnan@webmail.hzau.edu.cn (S.L.);

<sup>2</sup>Key Laboratory of Urban Agriculture in Central China (pilot run), Ministry of Agriculture, Wuhan 430070, China

<sup>3</sup>Laboratoire Reproduction et Développement des Plantes, INRA-CNRS-Lyon1-ENS, Ecole Normale Supérieure de Lyon, Lyon 520074, France; [mohammed.bendahmane@ens-lyon.fr](mailto:mohammed.bendahmane@ens-lyon.fr)

\*Correspondence: [fuxiaopeng@mail.hzau.edu.cn](mailto:fuxiaopeng@mail.hzau.edu.cn); Tel.: +86-159-2625-8658; Fax: +86-027-8728-2010

**This file includes:**

Supplementary Figure S1-S5

Supplementary Table S1-S7

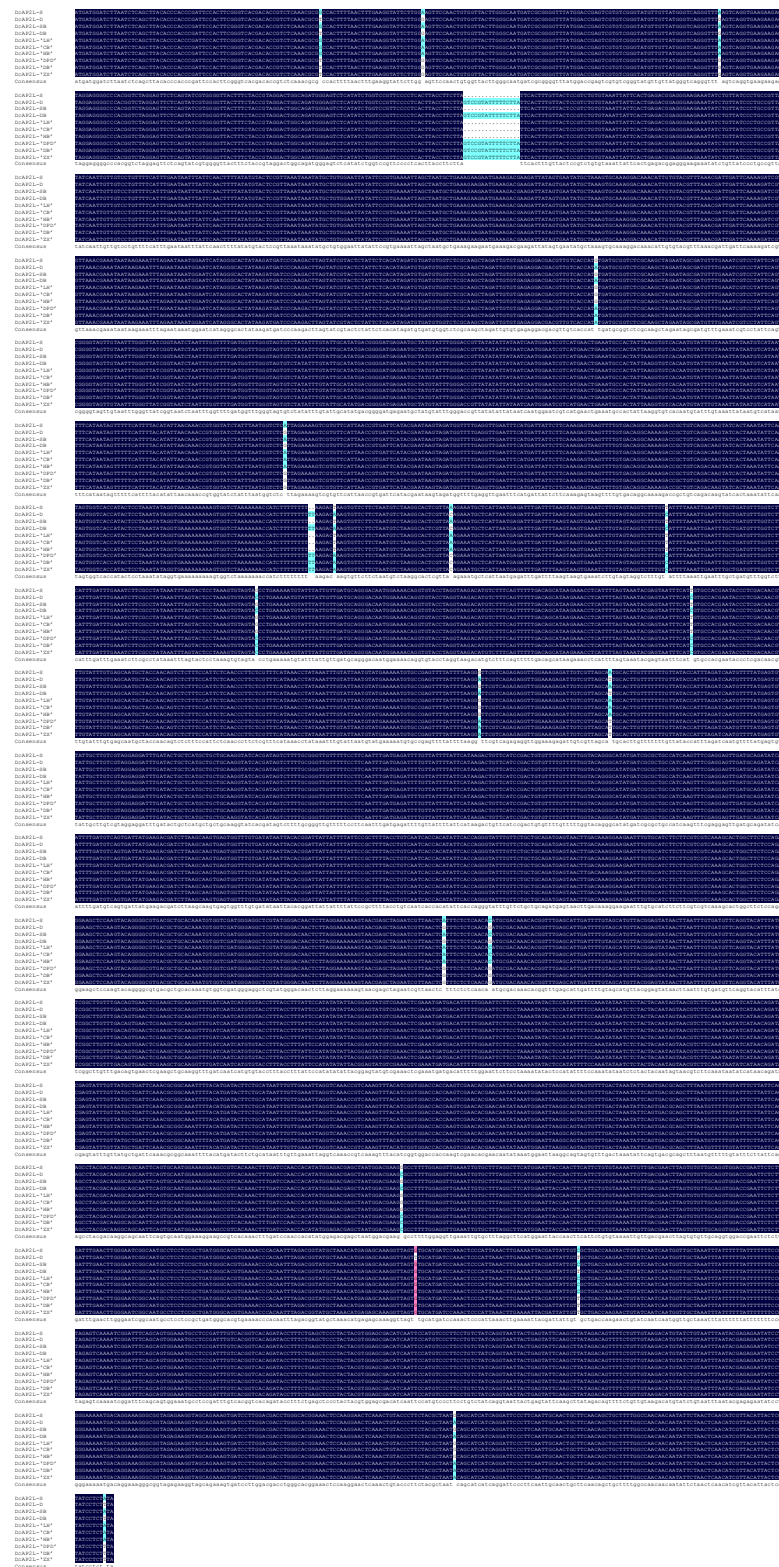

**Supplementary Figure S1:** Sequence alignment of full-length sequence of *DcAP2L*. *DcAP2L-S*, *DcAP2L-D*, *DcAP2L-SB*, *DcAP2L-DB*, *DcAP2L-LH*, *DcAP2L-CB*, *DcAP2L-HB*, *DcAP2L-DPD*, *DcAP2L-DB*, and *DcAP2L-ZX* represent full-length sequence of *DcAP2L* in ‘MH’, ‘X4’, single flower bulk of F<sub>2</sub>, double flower bulk of F<sub>2</sub>, ‘LH’, ‘CB’, ‘HB’, ‘DPD’, ‘DB’, and ‘ZX’, respectively. Sequence differences are highlighted with light blue.

|           |                                                                                                        |      |
|-----------|--------------------------------------------------------------------------------------------------------|------|
| DcAP2L-S  | ATGATGGATCTTAATCTCAGCTTACACCCACCCGATTCCACTTCGGGTCACGACACCGTCTCAAACCGG                                  | 100  |
| DcAP2L-D  | ATGATGGATCTTAATCTCAGCTTACACCCACCCGATTCCACTTCGGGTCACGACACCGTCTCAAACCGG                                  | 100  |
| DcAP2L-SB | ATGATGGATCTTAATCTCAGCTTACACCCACCCGATTCCACTTCGGGTCACGACACCGTCTCAAACCGG                                  | 100  |
| DcAP2L-DB | ATGATGGATCTTAATCTCAGCTTACACCCACCCGATTCCACTTCGGGTCACGACACCGTCTCAAACCGG                                  | 100  |
| Consensus | atgatggatcttaatctcagcttacacccacccgattccacttcgggtcacgacacccgtctcaaacggg                                 |      |
| DcAP2L-S  | GTTCACACTGTGGTACTTGGGCAATGATCGCGGGGTTATGGACCGAGTCTGTCGGGTATGTTGTTATGGGTCAGGGTT                         | 200  |
| DcAP2L-D  | GTTCACACTGTGGTACTTGGGCAATGATCGCGGGGTTATGGACCGAGTCTGTCGGGTATGTTGTTATGGGTCAGGGTT                         | 200  |
| DcAP2L-SB | GTTCACACTGTGGTACTTGGGCAATGATCGCGGGGTTATGGACCGAGTCTGTCGGGTATGTTGTTATGGGTCAGGGTT                         | 200  |
| DcAP2L-DB | GTTCACACTGTGGTACTTGGGCAATGATCGCGGGGTTATGGACCGAGTCTGTCGGGTATGTTGTTATGGGTCAGGGTT                         | 200  |
| Consensus | gttccaactgtggttacttgggcaatgatcgcggggttatggaccgagtcgtcgggtatgttgttatgggtcagggttt                        |      |
| DcAP2L-S  | TAGGAGGGGCCACGGTCTAGGAGTTCCTCAGTATCGTGGGTTACTTCTACCGTAGGACTGGCAGATGGGAGTCTCATATCTGGGCAATGGAAAACAG      | 300  |
| DcAP2L-D  | TAGGAGGGGCCACGGTCTAGGAGTTCCTCAGTATCGTGGGTTACTTCTACCGTAGGACTGGCAGATGGGAGTCTCATATCTGGGCAATGGAAAACAG      | 300  |
| DcAP2L-SB | TAGGAGGGGCCACGGTCTAGGAGTTCCTCAGTATCGTGGGTTACTTCTACCGTAGGACTGGCAGATGGGAGTCTCATATCTGGGCAATGGAAAACAG      | 300  |
| DcAP2L-DB | TAGGAGGGGCCACGGTCTAGGAGTTCCTCAGTATCGTGGGTTACTTCTACCGTAGGACTGGCAGATGGGAGTCTCATATCTGGGCAATGGAAAACAG      | 300  |
| Consensus | taggaggggccacggcttaggagttctcagtatcgtggggttacttctaccgtaggactggcagatgggagttctcatatctgggcaatggaaaacag     |      |
| DcAP2L-S  | GTGTACCTAGGAGGATTTGATACTGCTCATGCTGCTGCAAGGGCATATGATCGCGCTGCCATCAAGTTTCGAGGAGTTGATGCAGATATCAATTTTGATG   | 400  |
| DcAP2L-D  | GTGTACCTAGGAGGATTTGATACTGCTCATGCTGCTGCAAGGGCATATGATCGCGCTGCCATCAAGTTTCGAGGAGTTGATGCAGATATCAATTTTGATG   | 400  |
| DcAP2L-SB | GTGTACCTAGGAGGATTTGATACTGCTCATGCTGCTGCAAGGGCATATGATCGCGCTGCCATCAAGTTTCGAGGAGTTGATGCAGATATCAATTTTGATG   | 400  |
| DcAP2L-DB | GTGTACCTAGGAGGATTTGATACTGCTCATGCTGCTGCAAGGGCATATGATCGCGCTGCCATCAAGTTTCGAGGAGTTGATGCAGATATCAATTTTGATG   | 400  |
| Consensus | gtgtacctaggagatttgatactgctcatgctgctgcaagggcatatgatcgcgctgccatcaagtttcgagagttgatgcagatatacaattttgatg    |      |
| DcAP2L-S  | TCAGTGATTTAAGACGATCTTAAGCAAAATGAGTAACCTGCACAAGGAAGAATTTGTCGATCTTCTTCGTCGTCAAAGCACTGGCTTCTCCAGAGGAAG    | 500  |
| DcAP2L-D  | TCAGTGATTTAAGACGATCTTAAGCAAAATGAGTAACCTGCACAAGGAAGAATTTGTCGATCTTCTTCGTCGTCAAAGCACTGGCTTCTCCAGAGGAAG    | 500  |
| DcAP2L-SB | TCAGTGATTTAAGACGATCTTAAGCAAAATGAGTAACCTGCACAAGGAAGAATTTGTCGATCTTCTTCGTCGTCAAAGCACTGGCTTCTCCAGAGGAAG    | 500  |
| DcAP2L-DB | TCAGTGATTTAAGACGATCTTAAGCAAAATGAGTAACCTGCACAAGGAAGAATTTGTCGATCTTCTTCGTCGTCAAAGCACTGGCTTCTCCAGAGGAAG    | 500  |
| Consensus | tcagtgattatgaagacgatcttaagcaaatgagtaacctgcacaaggaagaatttgtgcatcttcttcgctgcaagcactggcttctccagaggaag     |      |
| DcAP2L-S  | CTCCAAGTACAGGGGCGTGACGCTGCACAAATGTGGTGCATGGGAGGCTCGTATGGGACAACCTCTTAGGAAAAAGTACATTTATCTCGGCTTGTTTGAC   | 600  |
| DcAP2L-D  | CTCCAAGTACAGGGGCGTGACGCTGCACAAATGTGGTGCATGGGAGGCTCGTATGGGACAACCTCTTAGGAAAAAGTACATTTATCTCGGCTTGTTTGAC   | 600  |
| DcAP2L-SB | CTCCAAGTACAGGGGCGTGACGCTGCACAAATGTGGTGCATGGGAGGCTCGTATGGGACAACCTCTTAGGAAAAAGTACATTTATCTCGGCTTGTTTGAC   | 600  |
| DcAP2L-DB | CTCCAAGTACAGGGGCGTGACGCTGCACAAATGTGGTGCATGGGAGGCTCGTATGGGACAACCTCTTAGGAAAAAGTACATTTATCTCGGCTTGTTTGAC   | 600  |
| Consensus | ctccaagtacagggcgctgacgctgcacaaatgtggtgcatagggagctcgatgggacaactcttaggaaaaagtacatttatctcggcttgtttgac     |      |
| DcAP2L-S  | AGTGAAGCTGGAAGCTGCAAGAGCCTACGACAAAGGAGCAATTCAGTGCATGGAAAGGAAGCGCTCACAAACTTTGATCCAACCATATGGAGACGAGC     | 700  |
| DcAP2L-D  | AGTGAAGCTGGAAGCTGCAAGAGCCTACGACAAAGGAGCAATTCAGTGCATGGAAAGGAAGCGCTCACAAACTTTGATCCAACCATATGGAGACGAGC     | 700  |
| DcAP2L-SB | AGTGAAGCTGGAAGCTGCAAGAGCCTACGACAAAGGAGCAATTCAGTGCATGGAAAGGAAGCGCTCACAAACTTTGATCCAACCATATGGAGACGAGC     | 700  |
| DcAP2L-DB | AGTGAAGCTGGAAGCTGCAAGAGCCTACGACAAAGGAGCAATTCAGTGCATGGAAAGGAAGCGCTCACAAACTTTGATCCAACCATATGGAGACGAGC     | 700  |
| Consensus | agtgaactggaagctgcaagagcctacgacaaaggagcaattcagtgcatggaaaggaagcgtcacaaactttgatccaaccacatattggagacgagc    |      |
| DcAP2L-S  | TAATGGACGAAGCGCCTTTTGGAGTGGACCGAATTCCTCTGATTTGAACTTGGGAATCGGCAATGCCCTCCGCTGATGGGCAAGTGAAGCCACAA        | 800  |
| DcAP2L-D  | TAATGGACGAAGCGCCTTTTGGAGTGGACCGAATTCCTCTGATTTGAACTTGGGAATCGGCAATGCCCTCCGCTGATGGGCAAGTGAAGCCACAA        | 800  |
| DcAP2L-SB | TAATGGACGAAGCGCCTTTTGGAGTGGACCGAATTCCTCTGATTTGAACTTGGGAATCGGCAATGCCCTCCGCTGATGGGCAAGTGAAGCCACAA        | 800  |
| DcAP2L-DB | TAATGGACGAAGCGCCTTTTGGAGTGGACCGAATTCCTCTGATTTGAACTTGGGAATCGGCAATGCCCTCCGCTGATGGGCAAGTGAAGCCACAA        | 800  |
| Consensus | taatggacgaagcgcttttggagtggaacccaatctctctgatttgaaacttgggaatcggcaatgctcctccgctgatgggcaagtgaaacccacaa     |      |
| DcAP2L-S  | TTTAGACGGTATGCTAAACATGAGAGCAAAGAGTCAAATCGGATTTACAGAGTGGAAATGCCCTCCGATTTGTACGGTACAGATACCTTTCTGAGCTC     | 900  |
| DcAP2L-D  | TTTAGACGGTATGCTAAACATGAGAGCAAAGAGTCAAATCGGATTTACAGAGTGGAAATGCCCTCCGATTTGTACGGTACAGATACCTTTCTGAGCTC     | 900  |
| DcAP2L-SB | TTTAGACGGTATGCTAAACATGAGAGCAAAGAGTCAAATCGGATTTACAGAGTGGAAATGCCCTCCGATTTGTACGGTACAGATACCTTTCTGAGCTC     | 900  |
| DcAP2L-DB | TTTAGACGGTATGCTAAACATGAGAGCAAAGAGTCAAATCGGATTTACAGAGTGGAAATGCCCTCCGATTTGTACGGTACAGATACCTTTCTGAGCTC     | 900  |
| Consensus | tttagacggtatgctaaacatgagagcaaaagatcaaatcggatttacagagtggaatgccctccgatttgtacgggtacagatacctttctgagctc     |      |
| DcAP2L-S  | CCTACTACGTGGAGCGACATCAATTCATGTCCTTCCCTGCTATCAGGAAAGGGCGGTAGAGAAGGTAGCAGAAAAGTATCCTTGGACGACCTGGGCAC     | 1000 |
| DcAP2L-D  | CCTACTACGTGGAGCGACATCAATTCATGTCCTTCCCTGCTATCAGGAAAGGGCGGTAGAGAAGGTAGCAGAAAAGTATCCTTGGACGACCTGGGCAC     | 1000 |
| DcAP2L-SB | CCTACTACGTGGAGCGACATCAATTCATGTCCTTCCCTGCTATCAGGAAAGGGCGGTAGAGAAGGTAGCAGAAAAGTATCCTTGGACGACCTGGGCAC     | 1000 |
| DcAP2L-DB | CCTACTACGTGGAGCGACATCAATTCATGTCCTTCCCTGCTATCAGGAAAGGGCGGTAGAGAAGGTAGCAGAAAAGTATCCTTGGACGACCTGGGCAC     | 1000 |
| Consensus | cctactacgtggagcgacatcaattccatgctccttccctgctatcaggaaagggcggtagagaaggttagcagaaaagtgatccttggacgacctgggcac |      |
| DcAP2L-S  | GGAAACTCCAAGGAACCTCAAACCTGTACCCTTCTACGCTAATA                                                           | 1100 |
| DcAP2L-D  | GGAAACTCCAAGGAACCTCAAACCTGTACCCTTCTACGCTAATA                                                           | 1100 |
| DcAP2L-SB | GGAAACTCCAAGGAACCTCAAACCTGTACCCTTCTACGCTAATA                                                           | 1100 |
| DcAP2L-DB | GGAAACTCCAAGGAACCTCAAACCTGTACCCTTCTACGCTAATA                                                           | 1100 |
| Consensus | ggaactccaaggaactcaaacctgtacccttctacgcttaata                                                            |      |
| DcAP2L-S  | ACAATATTCTAACTCAACATCGTTACATTACTCCTATCCTCTATA                                                          | 1145 |
| DcAP2L-D  | ACAATATTCTAACTCAACATCGTTACATTACTCCTATCCTCTATA                                                          | 1145 |
| DcAP2L-SB | ACAATATTCTAACTCAACATCGTTACATTACTCCTATCCTCTATA                                                          | 1145 |
| DcAP2L-DB | ACAATATTCTAACTCAACATCGTTACATTACTCCTATCCTCTATA                                                          | 1145 |
| Consensus | acaatattctaaactcaacatcgtttacattactcctatcctctata                                                        |      |

**Supplementary Figure S2:** Sequence alignment of CDS sequence of *DcAP2L*. *DcAP2L-S*, *DcAP2L-D*, *DcAP2L-SB* and *DcAP2L-SB* represent CDS sequence of *DcAP2L* in ‘MH’, ‘X4’, single flower bulk and double flower bulk of F<sub>2</sub>, respectively. Sequence differences are highlighted with light blue.

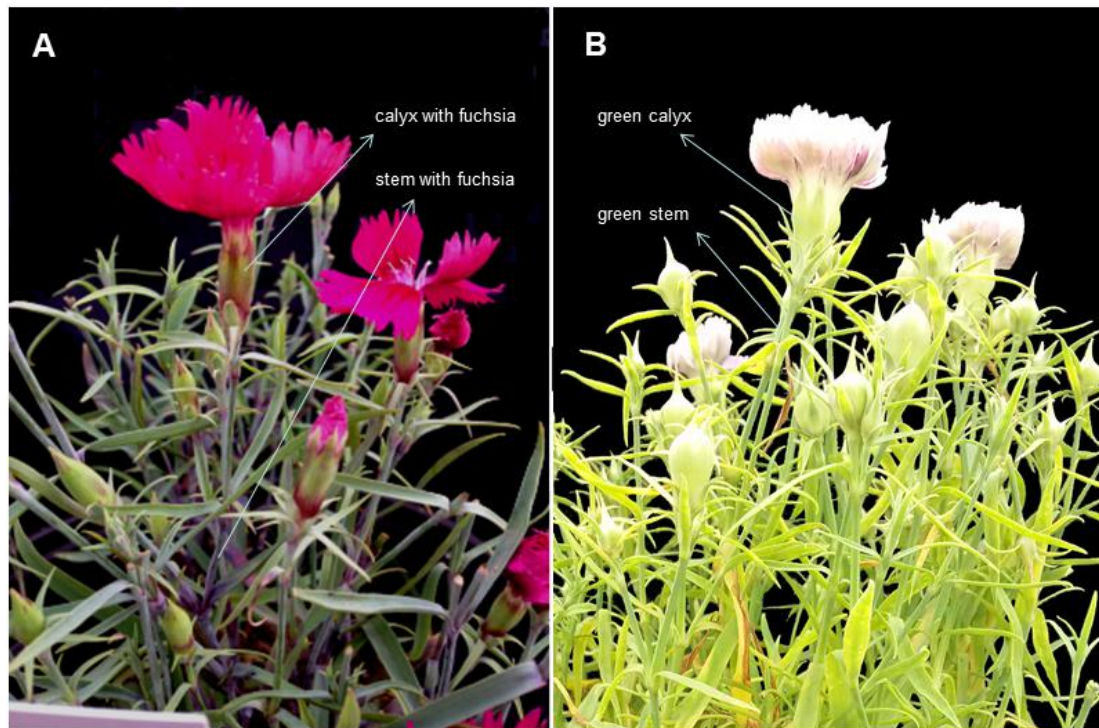

**Supplementary Figure S3:** Flower and stem color characteristics of the two parents.  
A, 'MH' shows calyxes and stem with fuchsia.  
B, 'X4' shows green calyxes and stem which are different from 'MH'.

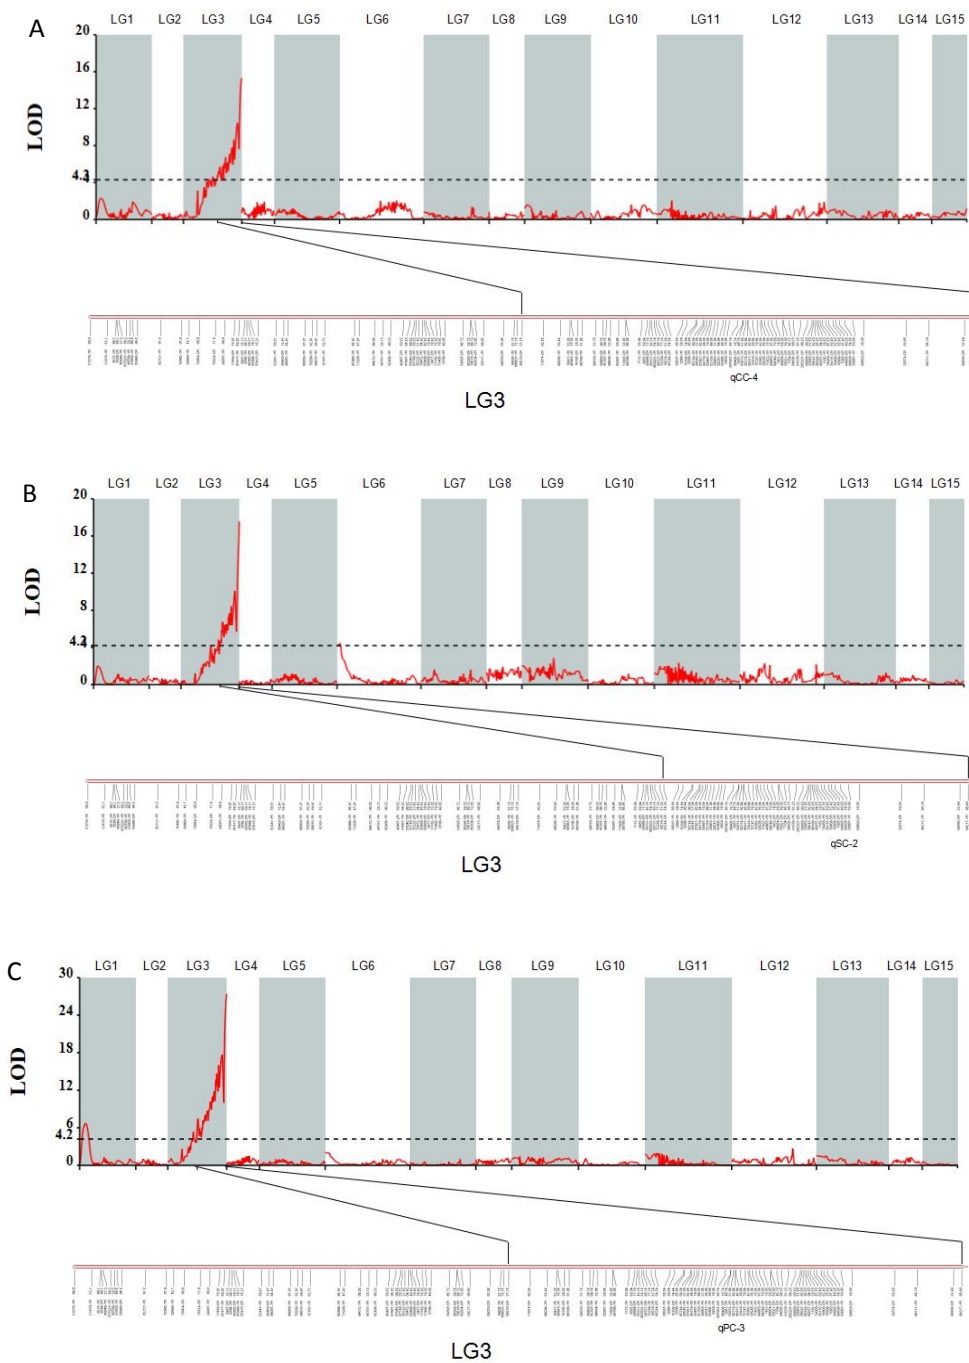

**Supplementary Figure S4:** Genetic location of QTLs for color related trait. A, B and C indicate genetic location of QTLs for calyxes color, stem color and style color of pistil, respectively. The horizontal dashed line represents a linkage group-wise logarithm of odds (LOD) significance threshold of 4.3 for calyxes color trait, and 4.2 for stem color and style color of pistil trait. qCC-4, qSC-2 and qPC-3 are most significant QTL regions for three color-related traits with the same peak position correspond the highest LOD value.

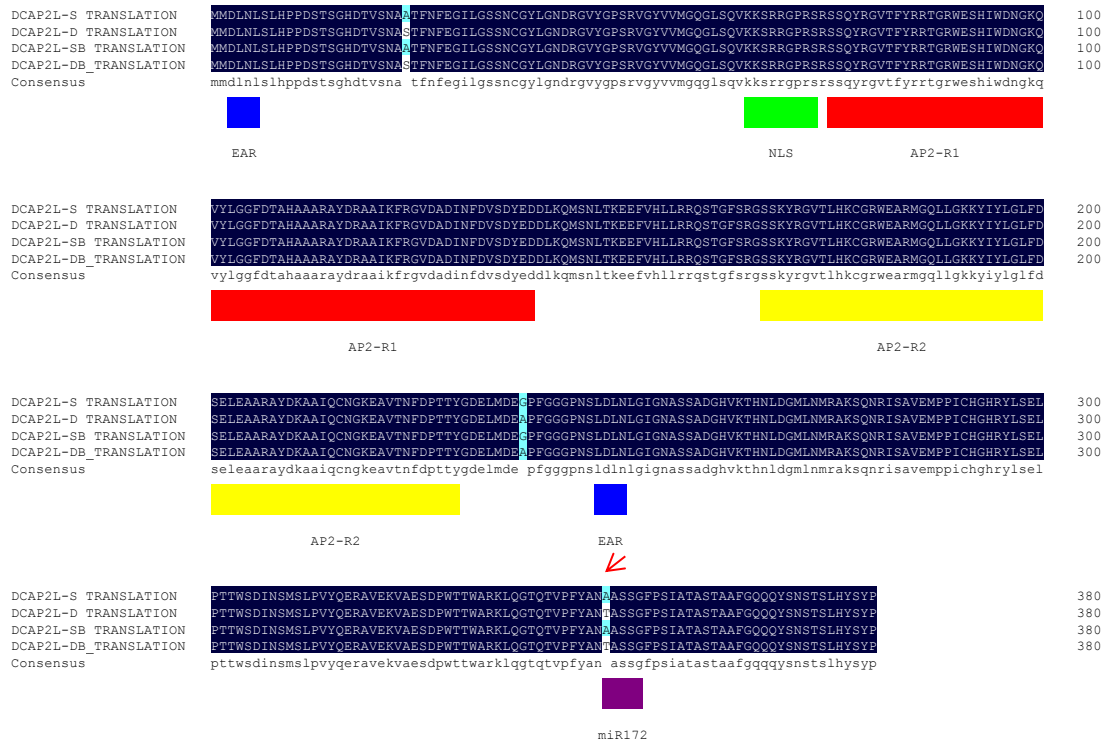

**Supplementary Figure S5:** Sequence alignment of putative amino acid sequence of *DcAP2L*. *DcAP2L-S* translation, *DcAP2L-D* translation, *DcAP2L-SB* translation and *DcAP2L-DB* translation represent putative amino acid sequence of *DcAP2L* in ‘MH’, ‘X4’ and single flower and double flower bulk of F<sub>2</sub> population, respectively. The missense mutation that lies within the miR172 target site of *DcAP2* is marked by red arrow. Color boxes beneath the sequence indicate the position of the two AP2 domains (AP2-R1 and AP2-R2, in red and yellow respectively), of the EAR motif-like sequences (in dark blue), of the nuclear localization signal (NLS, in green), and the sequence derive from miR172 target site (in purple).

**Supplementary Table S1:** Evaluation criteria for agronomic traits and assignment for qualitative characters of *D.Chinensis*.

| Trait                              | Abbreviation | Evaluation criterion                                                                                                                    | Assignment                                                                                        |
|------------------------------------|--------------|-----------------------------------------------------------------------------------------------------------------------------------------|---------------------------------------------------------------------------------------------------|
| Double flower trait (petal number) | DFT          | Average petal number of nine flowers in each plant                                                                                      | /                                                                                                 |
| Stamen number                      | SN           | Average stamen number of nine flowers in each plant                                                                                     | /                                                                                                 |
| Stem color                         | SC           | The stem color with green and fuchsia (part or all with fuchsia)                                                                        | 1 represent stem color with green; 2 represent stem color with fuchsia                            |
| Branch number                      | BN           | Number of branches on main stem                                                                                                         | /                                                                                                 |
| Leaf with wax                      | LWW          | It's actually a white appendage on the leaf, we wiped the leaves with a black cloth to judge whether the leaf have this white appendage | 1 represent the leaf have this white appendage; 2 represent the leaf have no this white appendage |
| Leaf width                         | LW           | Average width and length of two leaves which located at the fifth pair                                                                  | /                                                                                                 |
| Leaf length                        | LL           | from the top down                                                                                                                       | /                                                                                                 |
| Plant height                       | PH           | One plant measured three times                                                                                                          | /                                                                                                 |
| Plant width                        | PW           | One plant measured three times                                                                                                          | /                                                                                                 |
| Stem diameter                      | SD           | Measured three times for the stem diameter of main stem which next to the soil                                                          | /                                                                                                 |
| Calyx color                        | SC           | The calyx color with green and fuchsia (part or all with fuchsia)                                                                       | 1 represent calyx color with green; 2 represent calyx color with fuchsia                          |
| Style color of the pistil          | PC           | The style color with white and fuchsia(part or all with fuchsia)                                                                        | 1 represent style color with white; 2 represent style color with fuchsia                          |

**Supplementary Table S2:** Primers used for quantitative PCR and cloning.

| Name                  | Application | Forward primer (5'-3')                         | Reverse primer (5'-3')                  |
|-----------------------|-------------|------------------------------------------------|-----------------------------------------|
| <i>DcAP2L</i>         | qRT-PCR     | GATGGGAGGCTCGTAT<br>GG                         | CCGTCTAAATTGTGGGTTTT                    |
| <i>DcAGa</i>          | qRT-PCR     | GCATTAGTAGAATCCG<br>ATCAA                      | TCGTAGTCACCACCACCCG                     |
| <i>DcAGb</i>          | qRT-PCR     | CGAATCCGATCCAAAA<br>AGAATG                     | TCGTACTCGCTGCTACCTCC                    |
| <i>DcGAPDH</i>        | qRT-PCR     | CGGAAAGTTGACTGGT<br>ATGGC                      | CATCCTCGGTGTAGCCCAA<br>AT               |
| <i>DcAP2L</i>         | cloning     | TGTATTCCCCTTTGTAC<br>ACTCAC                    | GACACGATTCAGACTATGAA<br>CACT            |
| miR172a-pr<br>ecursor | cloning     | TGTGGTCTCAAATGTG<br>CTGTGGCATCATCAAG<br>ATTCAC | TGTGGTCTCAAAGCGCCGAT<br>GCAGCATCATCAAGA |



**Supplementary Table S3:** Number of floral organs of ‘MH’, ‘X4’ and F<sub>1</sub> plants in *D. chinensis*.

| Floral organ            | ‘MH’       | ‘X4’       | F <sub>1</sub> |
|-------------------------|------------|------------|----------------|
| Sepal                   | 5.00±0.00  | 5.00±0.00  | 5.00±0.00      |
| Petal                   | 5.00±0.00  | 25.43±3.18 | 9.52±1.65      |
| Chimera<br>petal-stamen | 0.00±0.00  | 3.43±1.93  | 2.34±1.58      |
| Stamen                  | 10.00±0.00 | 13.62±2.26 | 8.54±2.33      |
| Style                   | 2.00±0.00  | 2.60±0.69  | 2.00±0.00      |
| Total                   | 22.00±0.00 | 50.08±4.95 | 27.4±2.22      |

Nine flowers in each plant and six plants in each material are measured.

Deviation values represents standard deviation.

**Supplementary Table S4:** Summary of sequence data from parents and 140 F<sub>2</sub> progenies.

| Sample ID                 | Raw reads | Clean reads | GC rate(%) | Q30 rate(%) | Average Depth |
|---------------------------|-----------|-------------|------------|-------------|---------------|
| 'X4'                      | 5223010   | 5222674     | 41.27      | 92.59       | 24.22         |
| 'MH'                      | 5287378   | 5287064     | 40.96      | 92.74       | 24.92         |
| Average of F <sub>2</sub> | 2652103   | 2651894     | 41.44      | 90.05       | 9.60          |

**Supplementary Table S5:** Type of variation of the identified 2353 SNP markers for constructing the genetic linkage map.

| Type of variation | NO. of SNP | Rate (%) |
|-------------------|------------|----------|
| A/C               | 230        | 9.77     |
| C/G               | 164        | 6.97     |
| G/A               | 686        | 29.15    |
| T/A               | 324        | 13.77    |
| C/T               | 747        | 31.75    |
| G/T               | 202        | 8.59     |
| Total             | 2353       | 100      |

**Supplementary Table S6:** Significance test of agronomic characters between parents and character statistics of parents and offspring.

| Trait                                   | Generation |            |                |                |
|-----------------------------------------|------------|------------|----------------|----------------|
|                                         | ‘MH’       | ‘X4’       | F <sub>1</sub> | F <sub>2</sub> |
| Double flower trait<br>(petal number)** | 5.00±0.00  | 25.43±3.18 | 9.52±1.65      | 11.89±6.21     |
| Stamen number                           | 10.00±0.00 | 13.62±2.26 | 8.54±2.33      | 9.51±1.89      |
| Stem color**                            | 2.00±0.00  | 1.00±0.00  | 1.00±0.00      | 1.54±0.50      |
| Branch number*                          | 12.25±2.38 | 10.25±1.64 | 19.25±1.48     | 12.26±3.78     |
| Leaf with wax**                         | 1.00±0.00  | 2.00±0.00  | 1.00±0.00      | 1.18±0.38      |
| Leaf width(mm)                          | 6.82±0.84  | 6.20±0.72  | 8.47±0.53      | 7.21±1.83      |
| Leaf length(cm)                         | 7.32±0.56  | 6.05±0.58  | 8.03±0.90      | 6.55±1.06      |
| Leaf length(cm)                         | 16.75±0.80 | 17.27±1.46 | 36.02±3.22     | 22.74±5.61     |
| Plant width**                           | 21.77±3.05 | 14.77±2.05 | 25.67±1.41     | 22.81±4.71     |
| Stem diameter                           | 2.74±0.46  | 2.23±0.31  | 3.61±0.22      | 3.03±0.71      |
| Calyx color**                           | 2.00±0.00  | 1.00±0.00  | 1.00±0.00      | 1.54±0.50      |
| Style color of the<br>pistil**          | 1.00±0.00  | 2.00±0.00  | 2.00±0.00      | 1.36±0.48      |

Note: DPS7.05 software is used for character statistics, and *t*-test is used to test significant difference of agronomic characters between two parents. \*\*indicates  $P < 0.01$ ; \*indicates  $P < 0.05$ . Deviation value represents standard deviation.

**Supplementary Table S7:** The sequence of fragment containing the sequence of pre-miR172a of *D.chinensis*.

>seq-pre-miR172a

GGTAAGGCTTTTCTTTCAAGATTCTCTCTGCCGACAGTGGTCCCAAAGATGGACCCCC  
ACCCACGAGGAGCATCGTGGA AAAAGAAGAGGTTCCAACCACGTCTACAAAGCAAGT  
GGATTGATGTGACATCTCCACTGACGTAAGGGATGACGCACAATCCCACTATCCTTCGC  
AAGACCCTTCTCTATATAAGGAAGTTCATTTCAATTTGGAGAGGACACGCTCGAGTATA  
AGAGCTCATTTTTACAACAATTACCAACAACAACAACAACAACAACAACAATTACAATTA  
CATTTACAATTATCGATAACAATGTGCTGTGGCATCATCAAGATTCACATGCCTCACTTCC  
ATTGACCTTTCTTTCCCACTTATTTTTTTGTTATTTTGTAAAAAAAATTGTTTTTTTTTTT  
TTTTAATATTATTAGATGTGAAGCTTTCATATATGTGGTCCTTCAAATAATTGTATCAGAA  
AATATTATTGTGTTTTTATTATTATTATTGGGTCCATTTATTTTTATTTTTGTGGGAAGAG  
GTCAAGAGGAAAACAAATGATATGAGAATCTTGATGATGCTGCATCGGCGCTTGTCTTG  
CTTTAATGAGATATGCGAGAAGCCTATGATCGCATGATATTTGCTTTCAATTCTGTTGTG  
CACGTTGTAAAAAACCTGAGCATGTGTAGCTCAGATCCTTACCGCCGGTTTCGGTTCAT  
TCTAATGAATATATCACCCGTTACTATCGTATTTTTATGAATAATATTCTCCGTTCAATTTA  
CTGATTGTACCCTACTACTTATATGTACAATATTTAAAATGAAAACAATATATTGTGCTGAA  
TAGGTTTATAGCGACATCTATGATAGAGCGCCACAATAACAAACAATTGCGTTTTATTAT  
TACAAATCCAATTTTTAAAAAAGCGGCAGAACCGGTCAAACCTAAAAGACTGATTACA  
TAAATCTTATTCAAATTTCAAAAGTGCCCCAGGGGCTAGTATCTA
